# Supplementary material
Source: PubMed Central journal article supplement (PMC4561413)
Supplement: NIHMS709932-supplement-01.pdf [file NIHMS709932-supplement-01.pdf]

Sh3bgr overexpressing embryos (**C**). Enah protein was labeled in green and MHC was labeled in red. The Z-line and M-band are indicated within a sarcomere. Both knockdown and overexpression of Sh3bgr delocalize Enah from the Z-lines. **D-E**. Enah staining in control (**D**) and Sh3bgr overexpressing (**E**) animal cap cells. In Sh3bgr overexpressing animal cap cells, the Enah protein is highly enriched in tri-junctional foci (asterisk). **F-G**. The western blot analysis showed that the endogenous Enah protein level was sharply increased in whole embryos (**F**) or animal cap tissues (**G**) upon overexpression of Sh3bgr.

Scale bar (A-C) = 2μm Scale bar (D, E) = 10μm

#### **Figure S1. The expression pattern of *sh3bgr* and *sh3bgrl***

At stage 11, *sh3bgr* is broadly expressed in most of the dorsal mesoderm (**A**) and at stage 26, *sh3bgr* expression is observed in the somites and heart tissues (**C**, **C'**). In contrast, *sh3bgrl* expression is restricted to the posterior region of the dorsal mesoderm which develops into the presomitic tissues (**B**). **D**. *sh3bgr* is expressed as multiple splicing variants. The longer variant is marked by a red arrow and the blue arrow indicates the shorter variant. The sequence alignment for two major splicing variants are shown in (**E**).

#### **Figure S2. The knockdown phenotypes of *sh3bgr*.**

**A**. The myogenic regulatory factors are well expressed in the *sh3bgr* morphants. **B**. Microinjection of *sh3bgr* antisense morpholino (Sh3bgr-MO) effectively inhibited the mature mRNA formation of the gene. Lane1: control, Lane 2: Sh3bgr-MO 40ng, Lane 3: Sh3bgr-MO 50ng, Lane 4: Sh3bgr-MO 65ng. **C**. Knockdown of Sh3bgr caused a hypomorphic heart and somites. **D**. The Sh3bgr-flag protein localizes to the muscle fibers with regular intervals.

**Figure S3. Knockdown of *sh3bgr* disrupted sarcomere formation.**

**A-B.** Overexpression of *sh3bgr* altered the thick filament morphology (**B**) compared to control (**A**). **A'-B'**. The intensity plots show the intensity of yellow lines indicated in panels (A, B). **C.** The average length of thick filament in each samples is shown in the bar-graph. **D.** The western blot analysis revealed that knockdown or overexpression of *Sh3bgr* did not affect the expression level of MHC, myomesin, or  $\alpha$ -actinin significantly. **E-G.** The Enah protein localized to the Z-lines in control (**E**) and either knockdown (**F**) or overexpression (**G**) of *Sh3bgr* disrupted the localization of Enah. Also, overexpression of *Sh3bgr* resulted in abnormally discontinuous thick filaments compared to control (**G'**). **H.** Overexpression of *sh3bgr* in the animal cap tissues increased the intensity of Enah protein signals. The Enah signals were normalized to the DAPI channel and shown in the graph. Scale bar = 5 $\mu$ m
