# Supplementary material
Source: PubMed Central journal article supplement (PMC4561413)

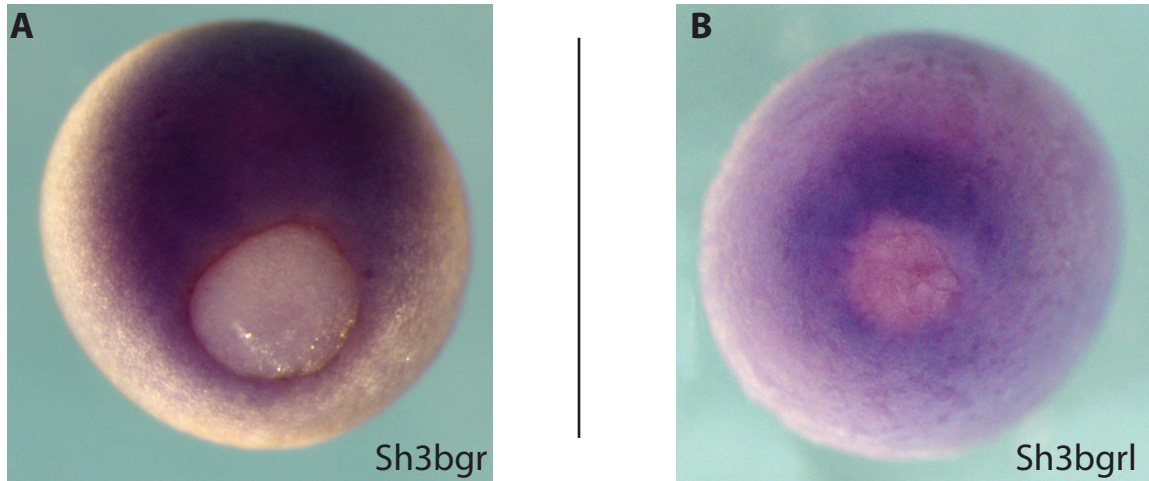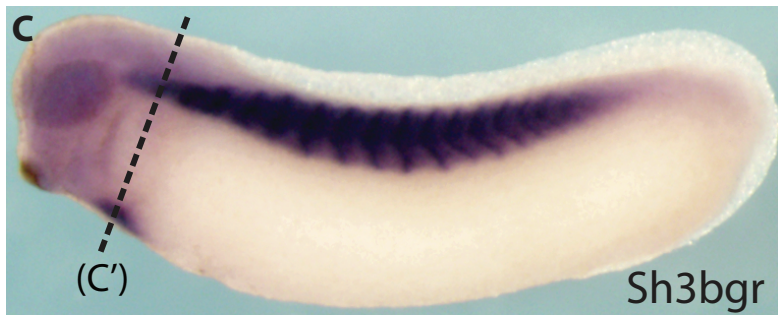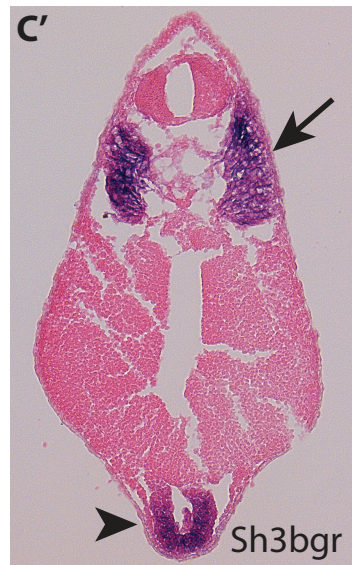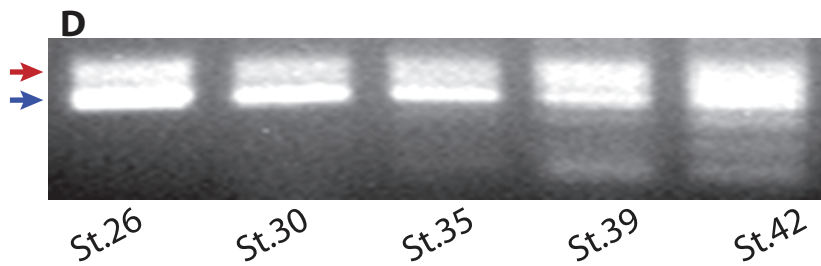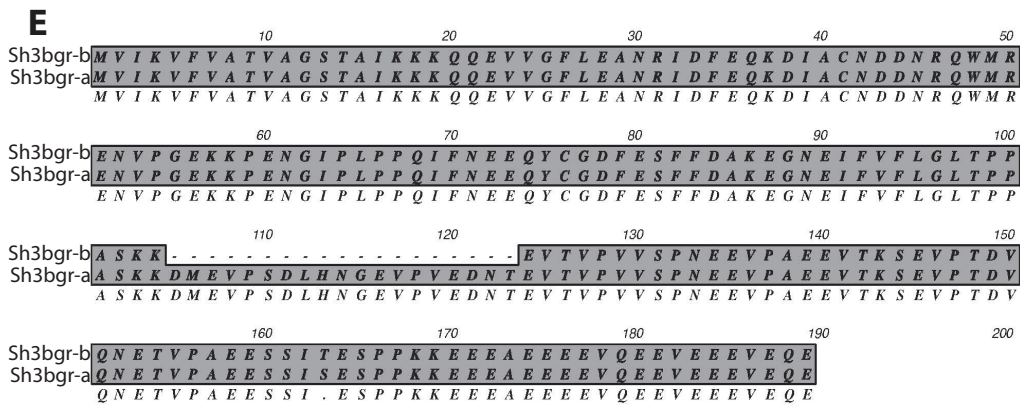

Figure S1 Jang et al.

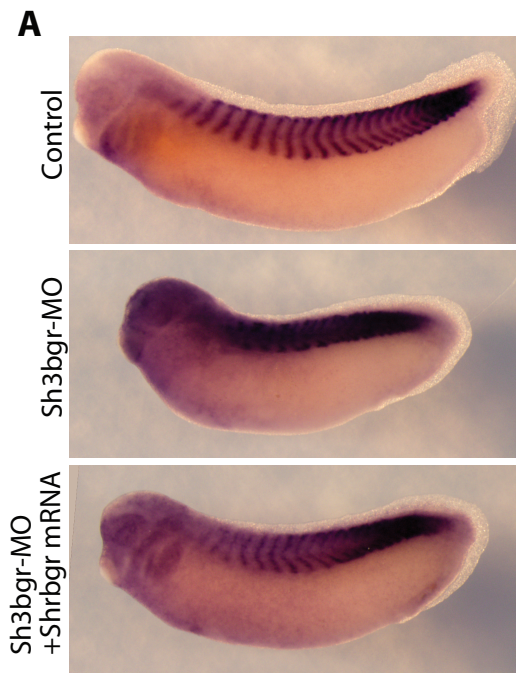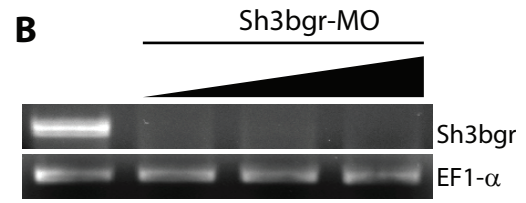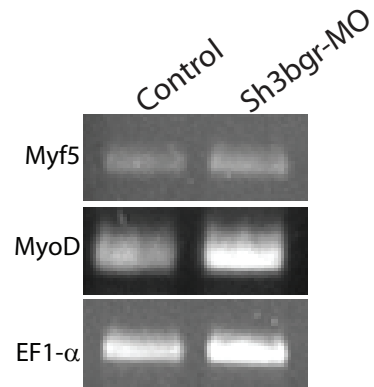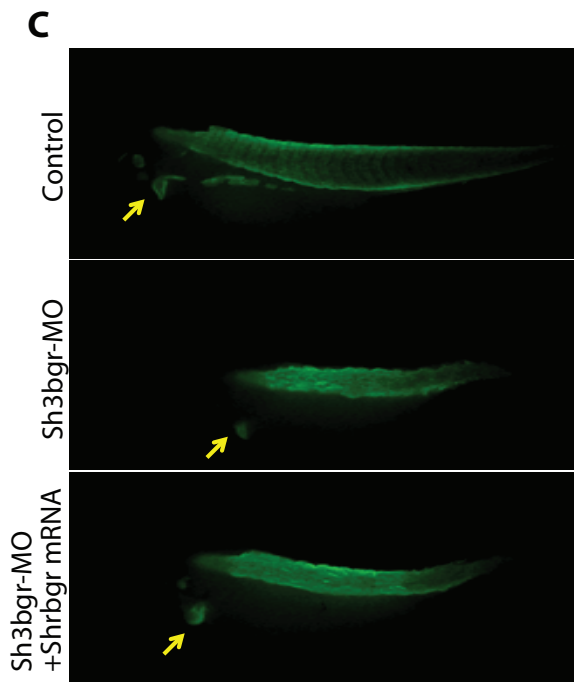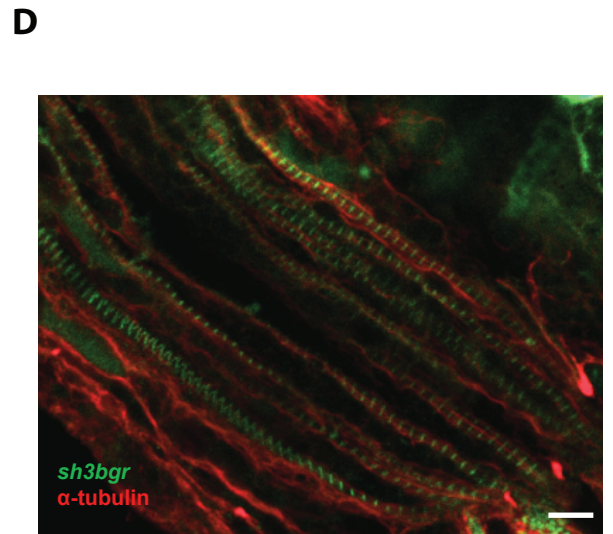

Figure S2 Jang et al.

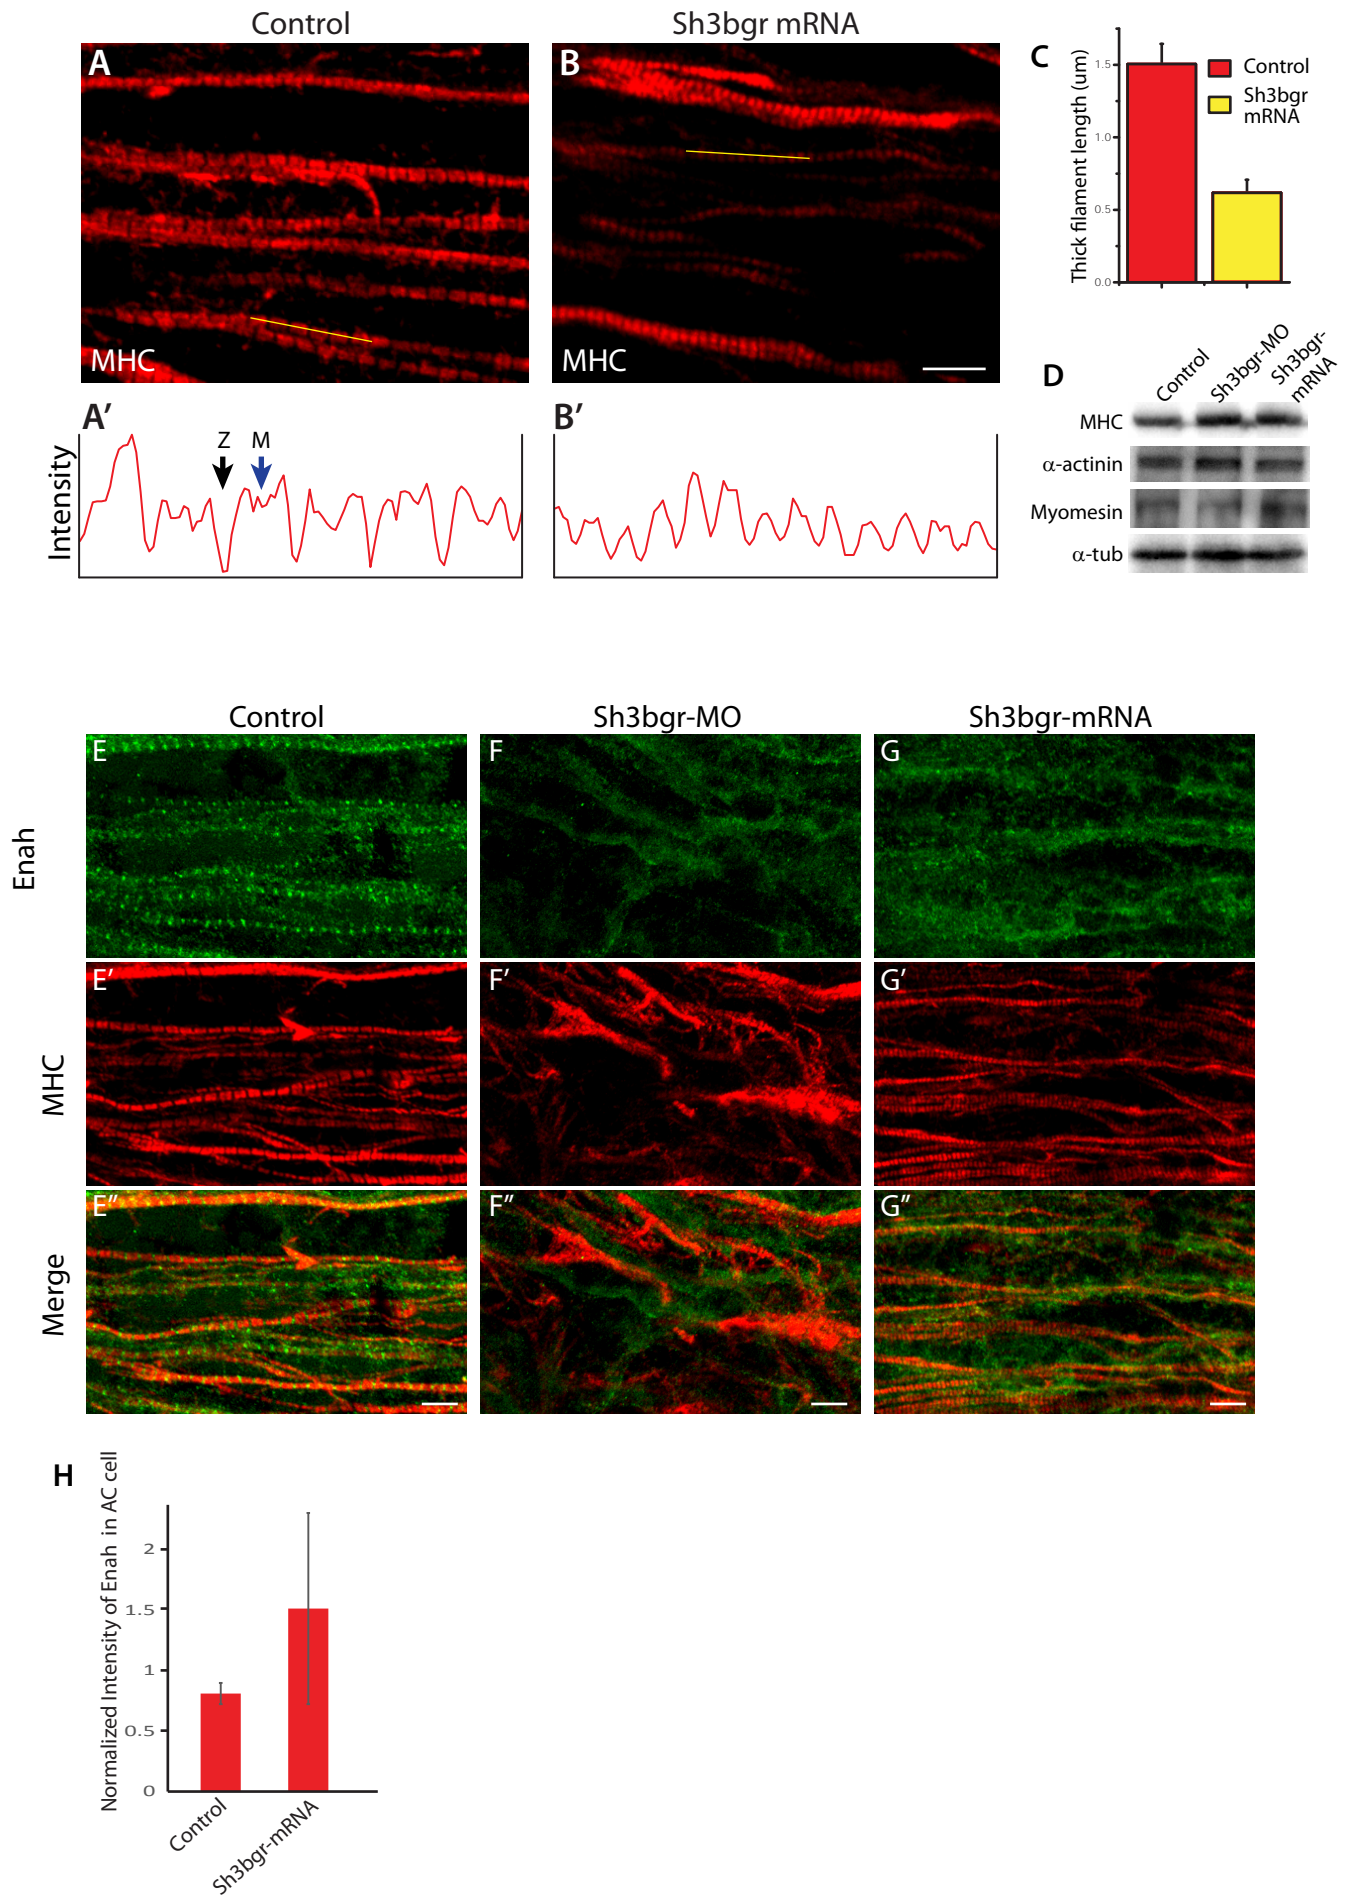

Figure S3 Jang et al.

Supplement: NIHMS709932-supplement.pdf [file NIHMS709932-supplement.pdf]
